# Supplementary material for: Analysis of SDHD promoter mutations in various types of melanoma
Source: PubMed Central journal article supplement (PMC4694872; doi:10.18632/oncotarget.4665), 2015-07-27
Supplement: oncotarget-06-25868-s001.pdf [file oncotarget-06-25868-s001.pdf]

## SUPPLEMENTARY TABLES

Supplementary Table S1: Characteristics of primary and metastatic samples in regard to *SDHD* promoter status

|                                          |                       | Primary Samples |     |                 |     | Metastatic Samples |                |     |                 |     |       |
|------------------------------------------|-----------------------|-----------------|-----|-----------------|-----|--------------------|----------------|-----|-----------------|-----|-------|
|                                          |                       | <i>SDHD</i> WT  |     | <i>SDHD</i> mut |     | Total              | <i>SDHD</i> WT |     | <i>SDHD</i> mut |     | Total |
|                                          |                       | <i>N</i>        | %   | <i>N</i>        | %   |                    | <i>N</i>       | %   | <i>N</i>        | %   |       |
| Sex                                      | Female                | 70              | 42  | 2               | 1,2 | 72                 | 66             | 42  | 4               | 2,3 | 70    |
|                                          | Male                  | 93              | 56  | 2               | 1,2 | 95                 | 83             | 52  | 5               | 3,2 | 88    |
| Age at Diagnose                          | <=60 years            | 68              | 40  | 1               | 0,6 | 69                 | 87             | 55  | 4               | 2,3 | 91    |
|                                          | >60 years             | 79              | 48  | 2               | 1,2 | 81                 | 58             | 37  | 3               | 1,9 | 61    |
|                                          | Missing data          | 16              | 10  | 1               | 0,6 | 17                 | 4              | 2,5 | 2               | 1,2 | 6     |
| Mutant oncogene <sup>#</sup>             | WT                    | 72              | 44  | 3               | 1,8 | 75                 | 49             | 32  | 2               | 1,3 | 51    |
|                                          | <i>BRAF</i> *         | 53              | 33  | 1               | 0,6 | 54                 | 58             | 38  | 5               | 3,3 | 63    |
|                                          | <i>NRAS</i> *         | 31              | 19  | 0               | 0   | 31                 | 36             | 24  | 2               | 1,3 | 38    |
|                                          | <i>KIT</i>            | 2               | 1,2 | 0               | 0   | 2                  | 1              | 0,6 | 0               | 0   | 1     |
|                                          | WT                    | 41              | 60  | 1               | 1,4 | 42                 | 53             | 51  | 1               | 1   | 54    |
|                                          | <i>TERT</i> prom. mut | 30              | 42  | 0               | 0   | 30                 | 45             | 43  | 5               | 4,8 | 50    |
| <i>BRAF</i> and <i>NRAS</i> <sup>#</sup> | Either mutant*        | 84              | 52  | 1               | 0,6 | 85                 | 93             | 61  | 7               | 5   | 100   |
|                                          | Both WT               | 74              | 46  | 3               | 1,9 | 77                 | 50             | 33  | 2               | 1,3 | 52    |
| Stage at diagnosis                       | I                     | 5               | 3   | 0               | 0   | 5                  | 35             | 22  | 2               | 1,3 | 37    |
|                                          | II                    | 59              | 35  | 1               | 0,6 | 60                 | 51             | 32  | 3               | 1,9 | 54    |
|                                          | III                   | 47              | 28  | 2               | 1,2 | 49                 | 43             | 27  | 1               | 0,6 | 44    |
|                                          | IV                    | 7               | 4   | 0               | 0   | 7                  | 5              | 3,2 | 0               | 0   | 5     |
|                                          | Missing data          | 45              | 27  | 1               | 0,6 | 46                 | 15             | 10  | 3               | 1,9 | 18    |
| Anatomic distribution of primary         | Non-acral             | 89              | 54  | 3               | 1,8 | 92                 | 117            | 74  | 6               | 3,8 | 123   |
|                                          | Acral                 | 18              | 11  | 0               | 0   | 18                 | 17             | 11  | 0               | 0   | 17    |
|                                          | Mucosal               | 18              | 11  | 0               | 0,6 | 18                 | 9              | 6   | 1               | 0,6 | 10    |
|                                          | Eye (conj.)           | 38              | 23  | 1               | 0   | 39                 | 4              | 2,5 | 0               | 0   | 4     |

(Continued)

|                                        |              | Primary Samples |     |          |     | Metastatic Samples |         |     |          |     |       |
|----------------------------------------|--------------|-----------------|-----|----------|-----|--------------------|---------|-----|----------|-----|-------|
|                                        |              | SDHD WT         |     | SDHD mut |     | Total              | SDHD WT |     | SDHD mut |     | Total |
|                                        |              | N               | %   | N        | %   |                    | N       | %   | N        | %   |       |
|                                        | Missing data | 0               | 0   | 0        | 0   | 0                  | 2       | 1,3 | 2        | 1,3 | 4     |
| Anatomic site of skin and acral tumors | Head & neck  | 26              | 16  | 0        | 0   | 26                 | 24      | 15  | 1        | 0,6 | 25    |
|                                        | Upper limbs  | 12              | 7   | 0        | 0   | 12                 | 10      | 6   | 1        | 0,6 | 11    |
|                                        | Trunk        | 43              | 26  | 2        | 1,2 | 45                 | 43      | 27  | 5        | 2,9 | 48    |
|                                        | Lower limbs  | 17              | 10  | 1        | 0,6 | 18                 | 46      | 29  | 0        | 0   | 45    |
|                                        | Genital      | 7               | 4   | 0        | 0   | 7                  | 2       | 1   | 0        | 0   | 2     |
|                                        | Eye (conj.)  | 38              | 22  | 1        | 0,6 | 39                 | 4       | 3   | 0        | 0   | 5     |
|                                        | Acral        | 18              | 11  | 0        | 0   | 18                 | 17      | 11  | 0        | 0   | 17    |
|                                        | Missing data | 2               | 1,2 | 0        | 0   | 2                  | 3       | 1,9 | 2        | 1,9 | 2     |
| Histologic type                        | ALM          | 10              | 6   | 0        | 0   | 10                 | 16      | 10  | 1        | 0,6 | 17    |
|                                        | LMM          | 2               | 1   | 0        | 0   | 2                  | 2       | 1   | 0        | 0   | 2     |
|                                        | NM           | 38              | 23  | 0        | 0   | 38                 | 34      | 22  | 2        | 1,2 | 36    |
|                                        | SSM          | 16              | 10  | 2        | 1,2 | 18                 | 27      | 17  | 1        | 0,6 | 28    |
|                                        | Unclassified | 97              | 58  | 2        | 1,2 | 99                 | 70      | 54  | 5        | 3,6 | 75    |
| Breslow thickness                      | 0.01-1.00mm  | 8               | 5   | 1        | 0,6 | 9                  | 23      | 13  | 1        | 0,6 | 24    |
|                                        | 1.01-2.00mm  | 18              | 11  | 0        | 0   | 18                 | 19      | 11  | 3        | 1,9 | 22    |
|                                        | 2.01-4.00mm  | 35              | 21  | 2        | 1,2 | 37                 | 44      | 26  | 0        | 0   | 44    |
|                                        | >4.00mm      | 50              | 30  | 0        | 0   | 50                 | 32      | 19  | 2        | 1,3 | 34    |
|                                        | Missing data | 52              | 31  | 1        | 0,6 | 53                 | 31      | 20  | 3        | 1,9 | 34    |
| Clark level (skin tumors only)         | II           | 1               | 0,6 | 0        | 0   | 1                  | 3       | 1,9 | 0        | 0   | 3     |
|                                        | III          | 15              | 9   | 0        | 0   | 15                 | 17      | 11  | 3        | 1,7 | 20    |
|                                        | IV           | 26              | 15  | 1        | 0,6 | 27                 | 42      | 27  | 1        | 0,6 | 43    |
|                                        | V            | 8               | 5   | 0        | 0   | 8                  | 12      | 8   | 1        | 0,6 | 13    |
|                                        | Unknown      | 113             | 68  | 3        | 1,8 | 116                | 75      | 47  | 4        | 2,9 | 79    |

(Continued)

|            |          | Primary Samples   |    |                    |     | Metastatic Samples |                   |    |                    |     |       |
|------------|----------|-------------------|----|--------------------|-----|--------------------|-------------------|----|--------------------|-----|-------|
|            |          | <i>SDHD</i><br>WT |    | <i>SDHD</i><br>mut |     | Total              | <i>SDHD</i><br>WT |    | <i>SDHD</i><br>mut |     | Total |
|            |          | <i>N</i>          | %  | <i>N</i>           | %   |                    | <i>N</i>          | %  | <i>N</i>           | %   |       |
| Ulceration | Absent   | 30                | 18 | 2                  | 1,2 | 32                 | 26                | 17 | 1                  | 0,6 | 27    |
|            | Present  | 53                | 32 | 1                  | 0,6 | 54                 | 31                | 20 | 0                  | 0   | 31    |
|            | Unknown  | 80                | 48 | 1                  | 0,6 | 81                 | 102               | 61 | 8                  | 5,2 | 110   |
| SLN        | Negative | 37                | 22 | 1                  | 0,6 | 36                 | 35                | 22 | 2                  | 1,3 | 37    |
|            | Positive | 46                | 28 | 2                  | 1,2 | 48                 | 32                | 20 | 1                  | 0,6 | 33    |
|            | Not done | 80                | 48 | 1                  | 0,6 | 81                 | 82                | 52 | 6                  | 4   | 88    |

ALM = acral lentiginous melanoma; NM = nodular melanoma; SSM = superficial spreading melanoma; LMM = lentigo maligna melanoma; SLN = sentinel lymph node; WT = wild-type; prom = promoter; mut = mutant

<sup>#</sup>*BRAF*, *NRAS*, *KIT* were screened in *n* = 162 primary and *n* = 153 metastatic tumor samples; the *TERT* promoter was screened in *n* = 72 primary and *n* = 104 metastatic tumor samples

\*1 metastatic case harbored a *BRAF* and a *NRAS* mutation

**Supplementary Table S2: Associations between primary tumor location and clinico-pathologic variables of 400 melanoma samples.**

|                  | Acral        |    | Non-acral Skin |     | Conjunctival |    | Mucosal |    | Occult |    | Missing data |    | Total |     |
|------------------|--------------|----|----------------|-----|--------------|----|---------|----|--------|----|--------------|----|-------|-----|
|                  | N            | %  | N              | %   | N            | %  | N       | %  | N      | %  | N            | %  | N     |     |
| Sex              |              |    |                |     |              |    |         |    |        |    |              |    |       |     |
|                  | Female       | 19 | 5              | 85  | 21           | 20 | 6       | 21 | 5      | 17 | 4            | 8  | 2     | 170 |
|                  | Male         | 16 | 4              | 136 | 34           | 23 | 6       | 12 | 3      | 26 | 7            | 17 | 4     | 230 |
| Age              | <=60 years   | 17 | 4              | 124 | 31           | 16 | 4       | 8  | 2      | 15 | 4            | 0  | 0     | 180 |
|                  | >60 years    | 18 | 5              | 92  | 23           | 19 | 5       | 24 | 6      | 28 | 7            | 0  | 0     | 181 |
|                  | Missing data | 0  | 0              | 5   | 0            | 8  | 2       | 1  | 0,2    | 0  | 0            | 25 | 6     | 39  |
| SDHD status      | Wild-type    | 34 | 9              | 212 | 53           | 42 | 11      | 32 | 8      | 41 | 10           | 23 | 6     | 384 |
|                  | Mutant       | 1  | 0,3            | 9   | 2,3          | 1  | 0,3     | 1  | 0,3    | 2  | 0,5          | 2  | 0,5   | 16  |
| SDHD mutations   | Wild-type    | 34 | 9              | 212 | 53           | 42 | 11      | 32 | 8      | 41 | 10           | 23 | 6     | 391 |
|                  | 523C>T       | 0  | 0              | 3   | 0,8          | 1  | 0,3     | 0  | 0      | 0  | 0            | 1  | 0,3   | 5   |
|                  | 541C>T       | 0  | 0              | 3   | 0,8          | 0  | 0       | 0  | 0      | 0  | 0            | 0  | 0     | 3   |
|                  | 544C>T       | 0  | 0              | 2   | 0,5          | 0  | 0       | 0  | 0      | 1  | 0,3          | 0  | 0     | 3   |
|                  | 542C>A       | 0  | 0              | 1   | 0,3          | 0  | 0       | 1  | 0,3    | 1  | 0,3          | 0  | 0     | 3   |
|                  | 547C>T       | 0  | 0              | 0   | 0            | 0  | 0       | 0  | 0      | 0  | 0            | 1  | 0,3   | 1   |
|                  | 547C>A*      | 0  | 0              | 0   | 0            | 0  | 0       | 0  | 0      | 1  | 0,3          | 0  | 0     | 1   |
| Mutant oncogene# | BRAF         | 9  | 2              | 96  | 26           | 12 | 3       | 3  | 0,8    | 20 | 5            | 2  | 0,5   | 142 |
|                  | KIT          | 0  | 0              | 0   | 0            | 1  | 0,2     | 3  | 0,8    | 0  | 0            | 0  | 0     | 4   |
|                  | NRAS         | 10 | 3              | 51  | 14           | 7  | 2       | 1  | 0,3    | 11 | 3            | 2  | 0,5   | 82  |
|                  | TERT prom.   | 4  | 2              | 62  | 30           | 13 | 6       | 4  | 2      | 12 | 6            | 0  | 0     | 95  |

(Continued)

|                             | Acral |     | Non-acral Skin |    | Conjunctival |     | Mucosal |     | Occult |     | Missing data |   | Total |
|-----------------------------|-------|-----|----------------|----|--------------|-----|---------|-----|--------|-----|--------------|---|-------|
|                             | N     | %   | N              | %  | N            | %   | N       | %   | N      | %   | N            | % |       |
| <i>BRAF</i> and <i>NRAS</i> | 20    | 5   | 145            | 39 | 19           | 5   | 4       | 1   | 31     | 8   | 3            | 1 | 222   |
|                             | 15    | 4   | 72             | 19 | 23           | 6   | 29      | 8   | 10     | 3   | 5            | 1 | 154   |
| Clinical stage at diagnosis | 3     | 0,7 | 40             | 10 | 0            | 0   | 3       | 0,7 | 0      | 0   | 0            | 0 | 46    |
|                             | 13    | 3   | 95             | 24 | 0            | 0   | 14      | 3,5 | 0      | 0   | 0            | 0 | 122   |
|                             | 16    | 4   | 73             | 18 | 0            | 0   | 7       | 2   | 26     | 7   | 0            | 0 | 122   |
|                             | 2     | 0,5 | 6              | 2  | 0            | 0   | 5       | 1   | 16     | 4   | 0            | 0 | 29    |
|                             | 1     | 0,3 | 7              | 2  | 43           | 11  | 4       | 1   | 1      | 0,2 | 25           | 6 | 81    |
| Ulceration                  | 7     | 15  | 50             | 13 | 0            | 0   | 4       | 1   | 1      | 0,3 | 0            | 0 | 62    |
|                             | 15    | 14  | 65             | 16 | 1            | 0,3 | 7       | 2   | 0      | 0   | 0            | 0 | 88    |
|                             | 13    | 3   | 106            | 27 | 42           | 11  | 22      | 5   | 42     | 10  | 25           | 6 | 250   |
| Sentinel lymph node         | 10    | 3   | 60             | 15 | 0            | 0   | 7       | 2   | 1      | 0,3 | 0            | 0 | 78    |
|                             | 13    | 3   | 69             | 17 | 0            | 0   | 1       | 0,3 | 1      | 0,3 | 0            | 0 | 84    |
|                             | 12    | 3   | 92             | 23 | 43           | 11  | 25      | 6   | 41     | 10  | 25           | 6 | 238   |

\*546C > A *SDHD* promoter mutation was found to present in the germline;

#*BRAF*, *NRAS*, *KIT* were screened in  $n = 376$ , the *TERT* promoter in  $n = 210$  cases; 2 cases harbored a *BRAF* and a *NRAS* mutation

**Supplementary Table S3: SDHD promoter variants called in whole exome data of 92 melanomas**

| Patient | Sample         | Chr. | Position    | Reference allele | Alternative allele | Average coverage | Read coverage | Reads alternative allele | Variant frequency | Core ETS site'TTCC' changed |
|---------|----------------|------|-------------|------------------|--------------------|------------------|---------------|--------------------------|-------------------|-----------------------------|
| Pat_22  | post-treatment | 11   | 111,957,539 | T                | A                  | 25.53            | 31            | 2                        | 0.065             | Abrogated, TTCC>TATCC       |
| Pat_25  | pre-treatment  | 11   | 111,957,547 | C                | T                  | 21.16            | 27            | 8                        | 0.296             | Moved, TTCCC>TTTCC          |
| Pat_25  | post-treatment | 11   | 111,957,547 | C                | T                  | 22.47            | 30            | 11                       | 0.367             | Moved, TTCCC>TTTCC          |
| Pat_52  | pre-treatment  | 11   | 111,957,546 | T                | A                  | 17.19            | 19            | 2                        | 0.105             | Abrogated, TTCC>TACC        |

The data was taken from [24]. A minimum coverage of 10 unique reads and at least 2 reads supporting a variant was required.
